# Supplementary material
Source: publisher figshare collection journal article supplement (https://tandf.figshare.com/articles/dataset/_/5267743)

Supplementary table S1. Actual and counterfactual changes in total disability-adjusted life years (DALYs) from rheumatoid arthritis, 1990 to 2015.

| Location      | Total DALYs,<br>1990 | Expected from<br>population<br>growth scenario | Expected<br>from<br>population<br>growth &<br>aging<br>scenario | Total DALYs,<br>2015 | % change<br>due to<br>population<br>growth | % change<br>due to<br>population<br>aging | % change due<br>to<br>epidemiologic<br>changes | Actual<br>change |
|---------------|----------------------|------------------------------------------------|-----------------------------------------------------------------|----------------------|--------------------------------------------|-------------------------------------------|------------------------------------------------|------------------|
| Global        | 4 004 636            | 5 566 205                                      | 6 703 593                                                       | 6 333 406            | 39.0%                                      | 28.4%                                     | −9.2%                                          | 58.2%            |
| Nordic region | 40 173               | 46 040                                         | 50 220                                                          | 42 277               | 14.6%                                      | 10.4%                                     | −19.8%                                         | 5.2%             |
| Denmark       | 7286                 | 8101                                           | 8980                                                            | 9411                 | 11.2%                                      | 12.1%                                     | 5.9%                                           | 29.2%            |
| Finland       | 12 614               | 14 033                                         | 16 690                                                          | 11 570               | 11.2%                                      | 21.1%                                     | −40.6%                                         | −8.3%            |
| Greenland     | 50                   | 49                                             | 73                                                              | 87                   | −2.6%                                      | 48.1%                                     | 27.4%                                          | 72.9%            |
| Iceland       | 240                  | 307                                            | 371                                                             | 326                  | 28.1%                                      | 26.4%                                     | −18.6%                                         | 35.9%            |
| Norway        | 7256                 | 8846                                           | 9109                                                            | 6960                 | 21.9%                                      | 3.6%                                      | −29.6%                                         | −4.1%            |
| Sweden        | 12 727               | 14 598                                         | 15 386                                                          | 13 923               | 14.7%                                      | 6.2%                                      | −11.5%                                         | 9.4%             |

Figure 1. Age-standardized prevalence (95% UI) of rheumatoid arthritis by sex, 1990-2015

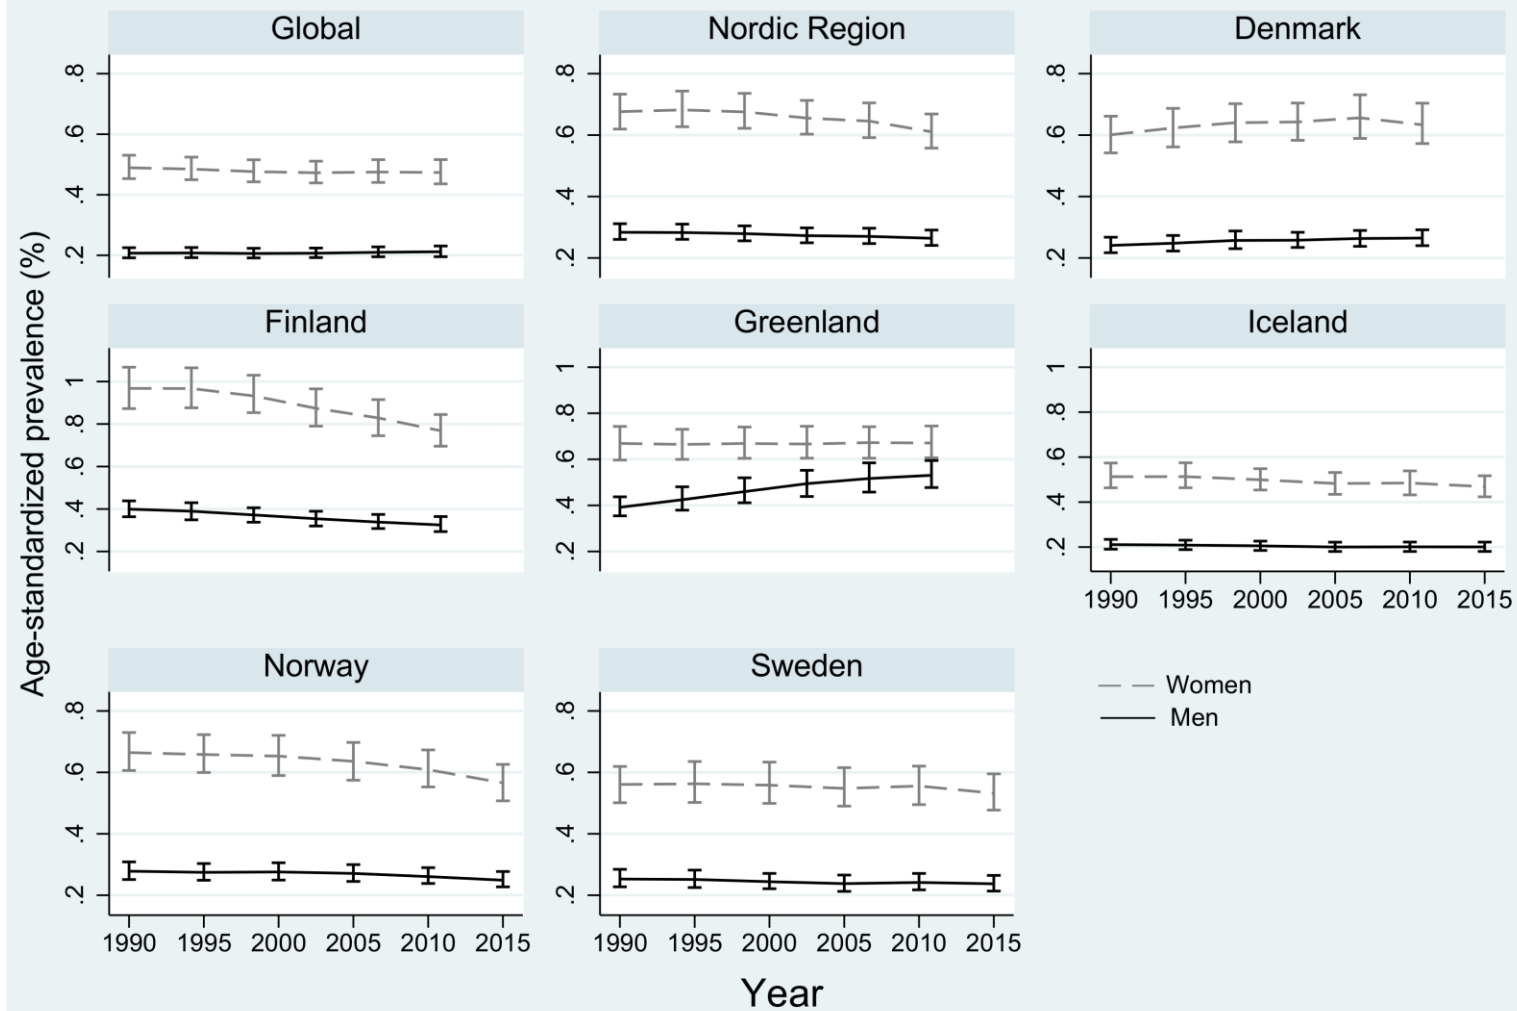



Figure 2. Age- and sex-specific prevalence (%) of rheumatoid arthritis in the Nordic region and the world, 2015.

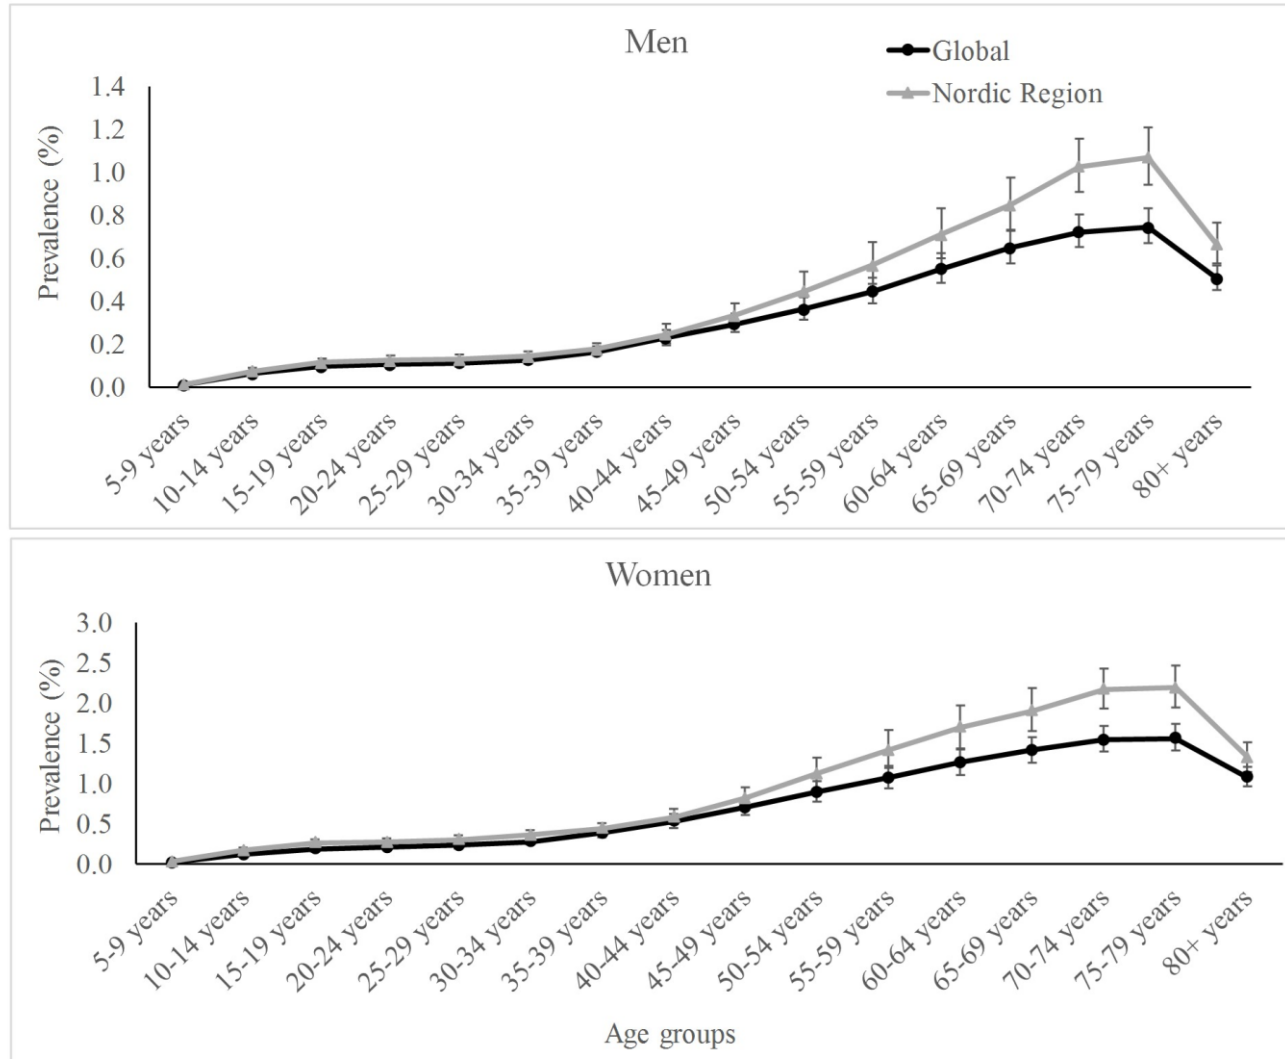

Figure 3. Age-standardized years life lost (YLL) from rheumatoid arthritis, 1990-2015

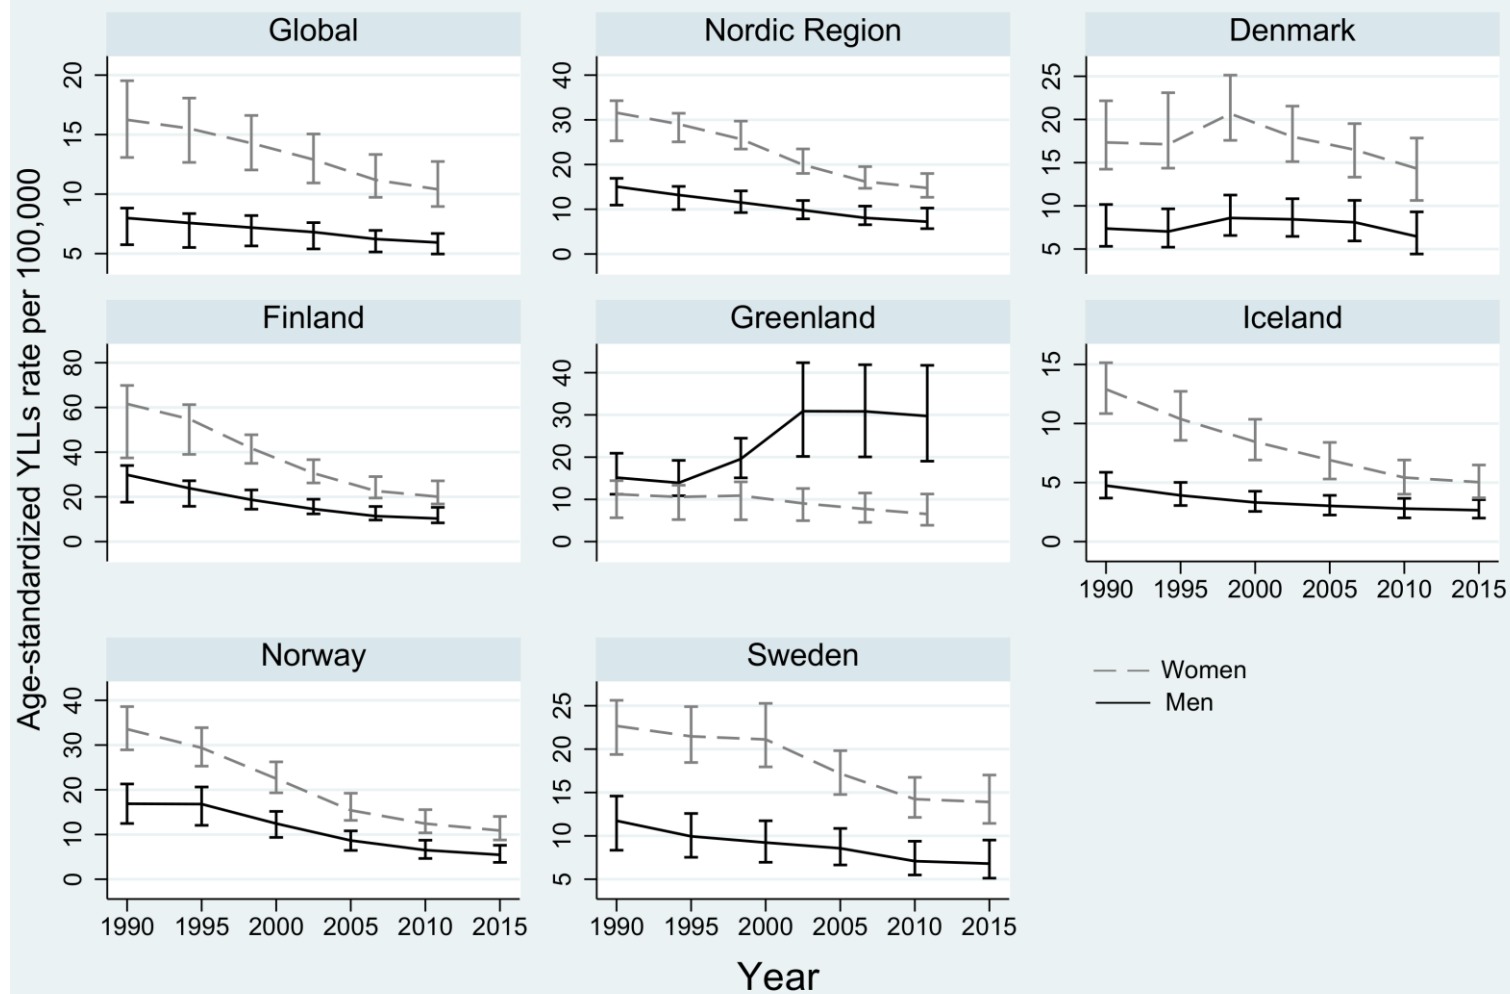



Figure 4. Burden of rheumatoid arthritis as a proportion of total years lived with disability (YLDs), 1990-2015

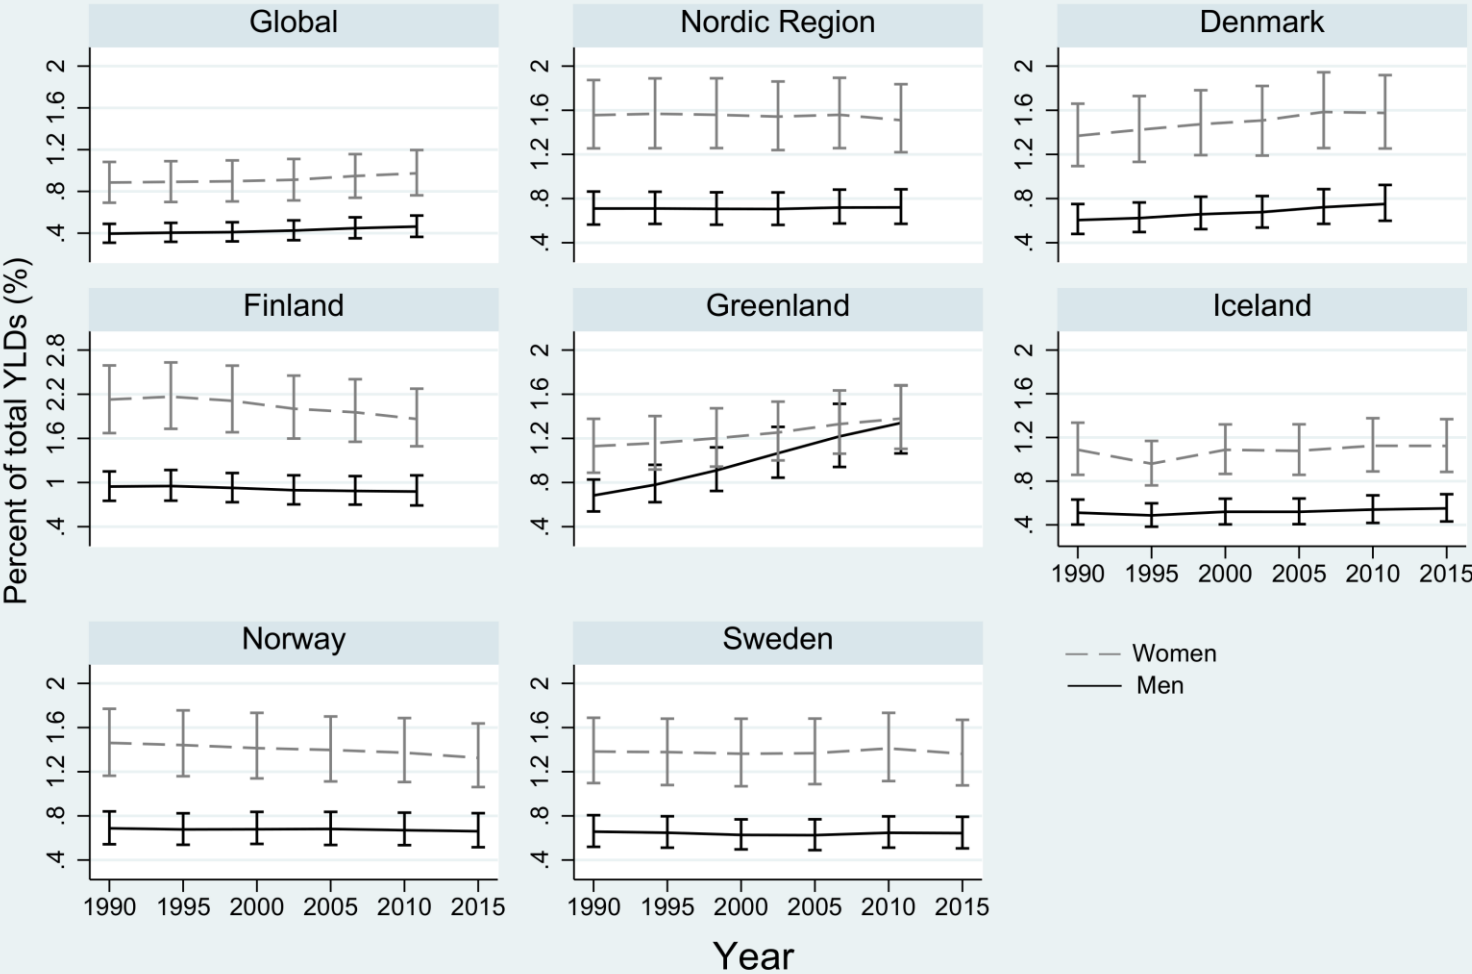

Figure 5. Age-standardized years lived with disability (YLDs) from rheumatoid arthritis, 1990-2015

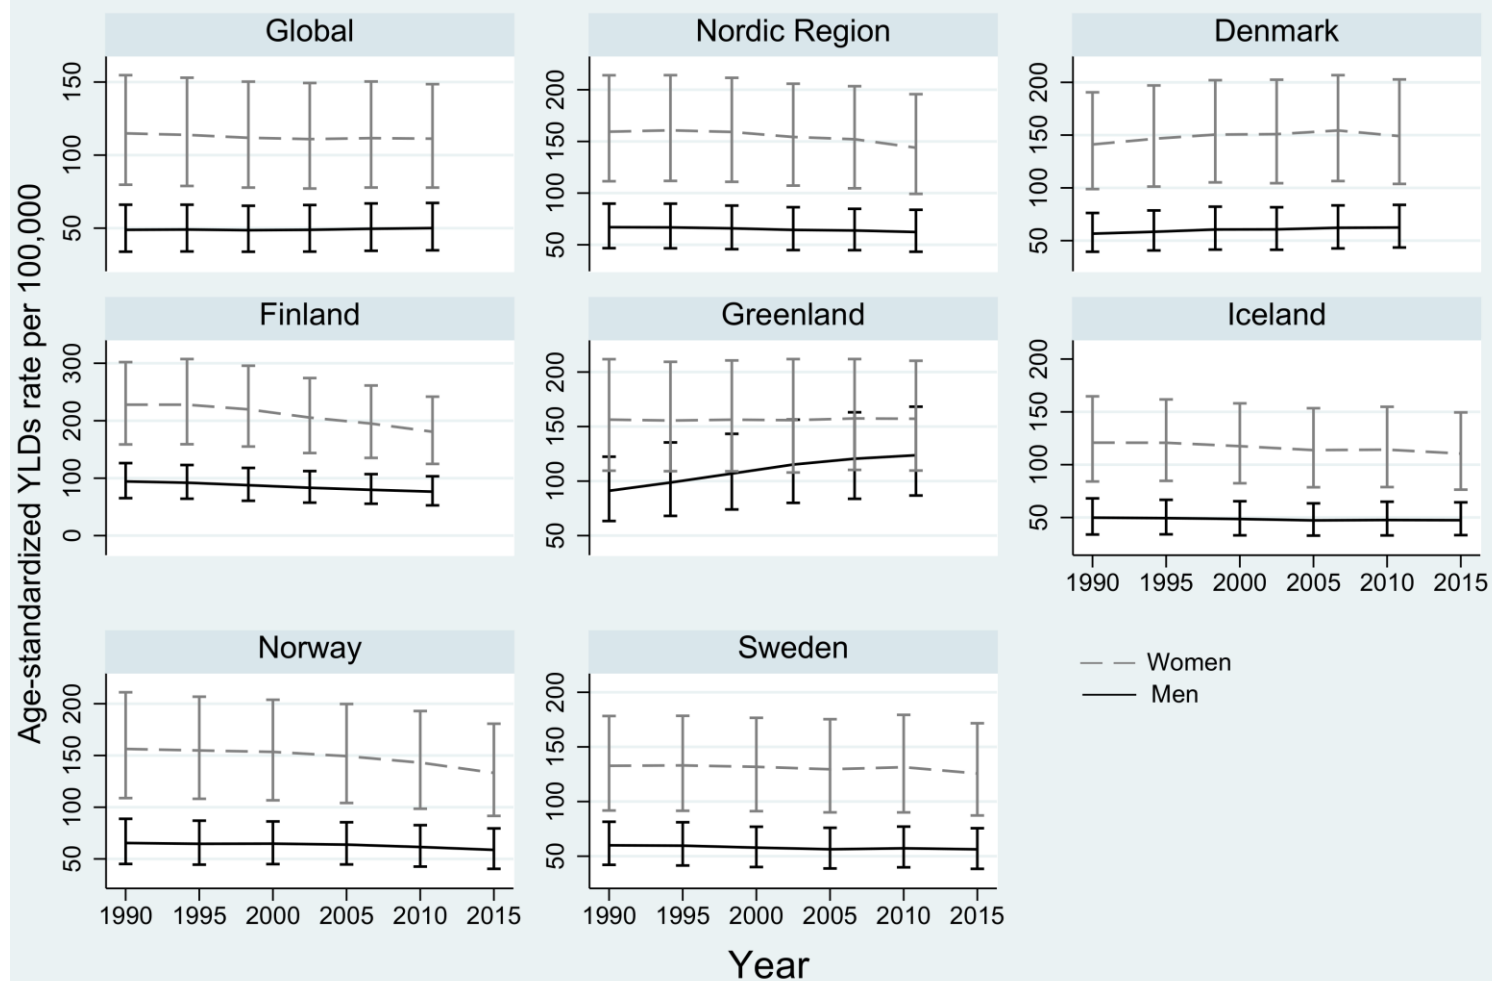



Figure 6. Burden of rheumatoid arthritis as a proportion of total disability-adjusted life years (DALYs), 1990-2015

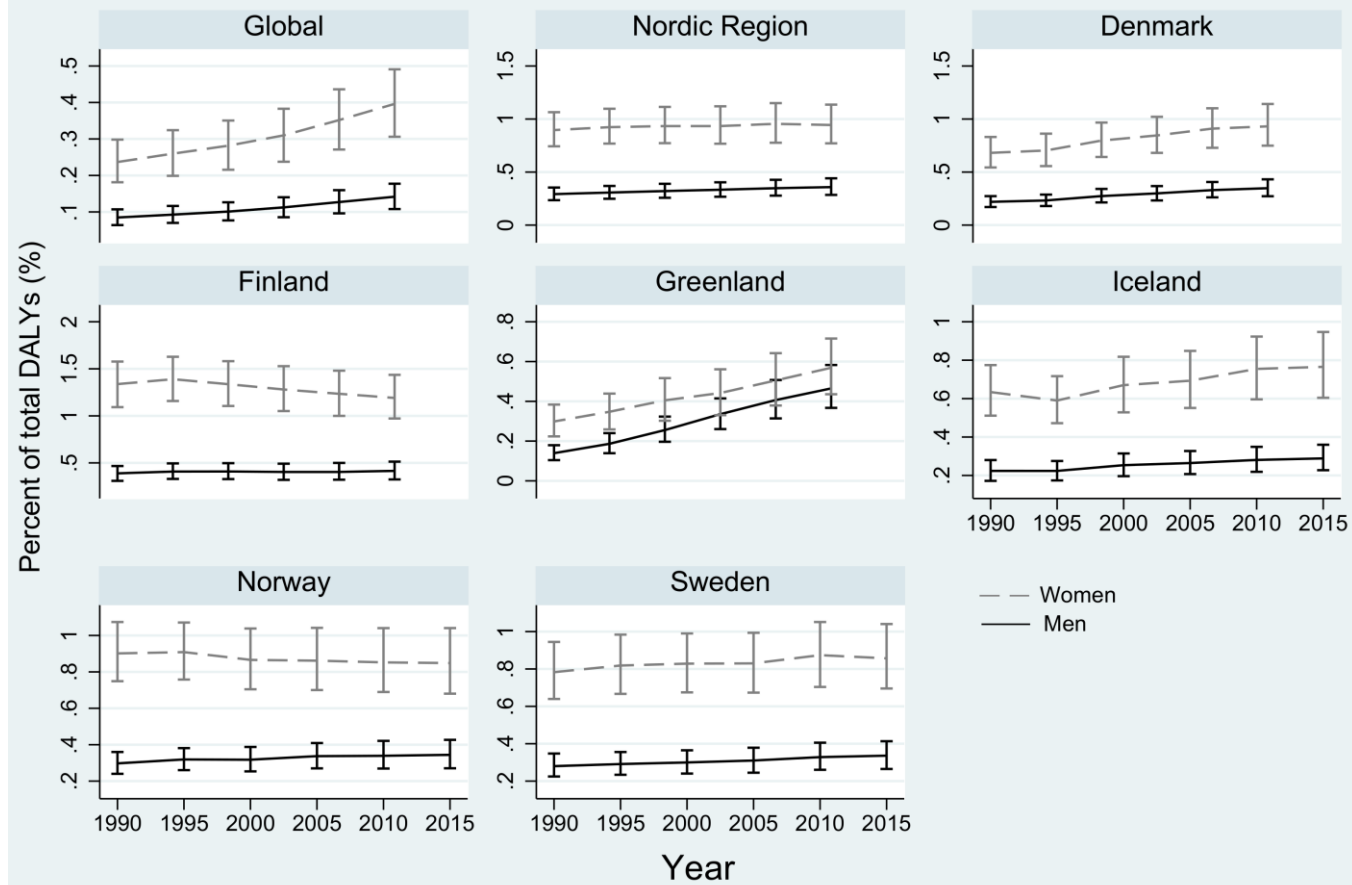

Figure 7. Age-standardized disability-adjusted life years (DALYs) from rheumatoid arthritis, 1990-2015

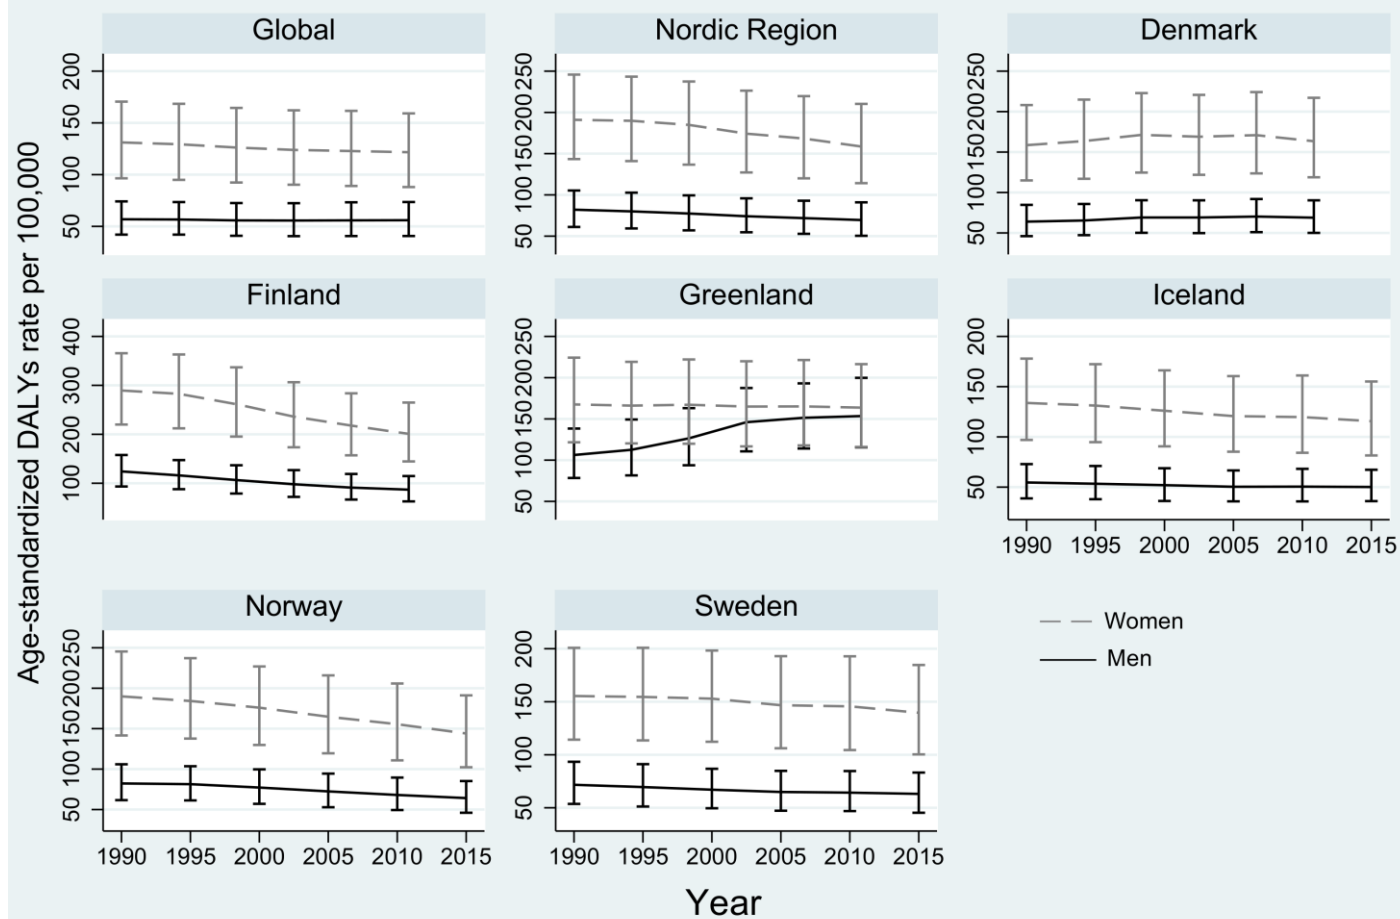

Supplement: Supplementary file 1 [file 1]
